# Supplementary material for: An integral evaluation method for synchronous drug release based on a mathematics set in guiding the preparation of multi-component traditional Chinese medicine
Source: Royal Society of Chemistry journal article supplement (doi:10.1039/c3ay41850b), 2014-01-01
Supplement: c3ay41850b1.pdf [file c3ay41850b1.pdf]

## Supplementary Data

### An integral evaluation method for the synchrony of drug release based on the mathematics set in guiding the preparation of a multi-component traditional Chinese medicine

Shiyu MA<sup>1</sup>, Lan SHEN<sup>1,2\*</sup>, Yu ZHAI<sup>1</sup>, Xiao LIN<sup>1,2</sup>, Yi FENG<sup>2\*</sup>, Lieming XU<sup>3</sup>, Kefeng RUAN<sup>2</sup>

<sup>1</sup> School of Traditional Chinese Medicine, Shanghai University of Traditional Chinese Medicine, Shanghai 201203, P.R.China; <sup>2</sup> Engineering Research Center of Modern Preparation Technology of Traditional Chinese medicine of Ministry of Education, Shanghai University of Traditional Chinese Medicine, Shanghai 201203, P.R. China. <sup>3</sup> Institute of Liver Diseases, Shanghai University of Traditional Chinese Medicine, Shanghai 201203, China

#### \*Address for correspondence:

Professor Lan Shen, Engineering Research Center of Modern Preparation Technology of Traditional Chinese Medicine, Ministry of Education, Shanghai University of Traditional Chinese Medicine, Room 10405, No.1200 Cailun Road, Shanghai 201203, P. R. China. Tel: 86-13916106844. Fax: 86-21-51322211. E-mail: [alansusu@sina.com](mailto:alansusu@sina.com).

Professor Yi Feng, Engineering Research Center of Modern Preparation Technology of Traditional Chinese Medicine, Ministry of Education, Shanghai University of Traditional Chinese Medicine, Room 5115, No.1200 Cailun Road, Shanghai 201203, P. R. China. Tel: 86-13501706144. Fax: 86-21-51322491. E-mail: [fyi@vip.sina.com](mailto:fyi@vip.sina.com)

**Running title: An integral evaluation method for the synchrony of drug release**

1           ***Supplementary data 1: The introduction of FZHY and liver fibrosis***

2           Liver fibrosis in chronic liver disease (such as chronic hepatitis B) is the inevitable  
3 pathological development process to cirrhosis. And its essence is liver tissue's extracellular  
4 matrix (extracellular matrix, ECM) hyperplasia and abnormal deposition, then causes  
5 pathological changes of liver structure or (and) dysfunction. Hyp is a non-essential amino  
6 acids, collagen-specific component. The content of Hyp is the important indicator to  
7 measure the body's collagen tissue metabolism, indirectly reflecting the status of the  
8 organization in collagen metabolism<sup>1</sup>. In the event of fibrosis tissues, Hyp content is much  
9 higher than normal, such as the content of Hyp in liver homogenate and the degree of liver  
10 fibrosis is proportional<sup>2</sup>. Liu Ping<sup>3</sup> had found that FZHY-C could effectively improve liver  
11 fibrosis of the chronic hepatitis B and liver fibrosis reversal rate up to 52%, and significantly  
12 could reduce the content of liver fibrosis serum markers, such as type IV collagen (IV-C),  
13 Hyaluronic Acid (HA), laminin (LN), and Type III procollagen peptide (P-III-P), which were  
14 from total 216 patients with chronic hepatitis B liver fibrosis in multicenter, randomized,  
15 double-blind and parallel control method. Liu Cheng<sup>4</sup> had found that FZHY-C drug serum  
16 could significantly inhibit the synthesis and secretion of collagen fiber cells. In this study, the  
17 weight of liver and the content of Hyp in liver tissue, as the main pharmacodynamic  
18 indicator could evaluated the reasonableness of the FZHY-P.

1 ***Supplementary data 2: The preparation of fat-soluble immediate release***

2 ***unit, water-soluble immediate release unit and water-soluble sustained release unit***

3 The preparation technology of fat-soluble immediate release unit (pellets) was as  
4 followed. A S250E50 extrusion spheronization machine was purchased from Chongqing  
5 Enger Granulating & Coating Technology Co., Ltd. (Chongqing,China). Took a certain amount  
6 of effective components according to the prescription, mixed uniformly and then added PEG  
7 6000 (Sinopharm Chemical Reagent Co., Ltd., Shanghai,China) , which dosage ratio was 3 : 2.  
8 The mixture was melt in 70 °C constant temperature water bath by stirring fully. Then  
9 transferred it rapidly to -20 °C refrigerator for curing 2 h. Cured samples were dried for 2 h in  
10 45 °C blast drying box, took out and crushed over 80 mesh sieve. Then the solid dispersion  
11 was prepared. Took a certain amount of this solid dispersion and microcrystalline cellulose  
12 (Anhui Shanhe Excipients Co., Ltd., Anhui,China), mixed uniformly. Water as a wetting agent,  
13 the mixture was kneaded into soft material. It was squeezed into the same diameter, smooth  
14 and compact strip by extrusion machine sieve (aperture 0.6 mm). The strip material was put  
15 quickly into the high-speed rotation of the rolling machine to roll into balls in a certain rolling  
16 rate. Pellets were took out, dried at 60 °C for 2 h. Finally 40-60 mesh pellets were screened.  
17 The process parameters were as below: extrusion speed: 45 r · min<sup>-1</sup> ; initial spheronization  
18 speed: 1000 r · min<sup>-1</sup> ; spheronization time: 3 min ; spheronization speed reduced 200 r per  
19 minute.

20 The preparation technology of water-soluble immediate release unit (pellets) was as  
21 followed. Took a certain amount of effective components according to the prescription,  
22 mixed uniformly, added a certain amount of water in the mixture and stirred it to dissolve to  
23 make the liquid medicine of 10% solid content. Then added quantity for 0.3% silica gel as

1 antisticking agent to make suspension liquid. After that microcrystalline cellulose blank  
2 pellet cores (diameter: 0.3-0.425 mm, Hangzhou Gaocheng Biological Nutrition Technology  
3 Co., Ltd., Hangzhou, China) were loaded by drug with using fluidized bed spray equipment  
4 (Mini Glatt 3 fluidized bed, Germany) in suspension state. The process parameters were as  
5 below: inlet air temperature: 45°C ; inlet pressure: 0.40-0.44 bar ; atomization pressure:  
6 1.10-1.22 bar ; liquid intake rate: 1.0-1.2 mL · min<sup>-1</sup>.

7 The preparation technology of water-soluble sustained release unit (pellets) was as  
8 followed. Took the above water-soluble immediate release unit (pellets), then adjusted the  
9 inlet temperature of 35°C with other same preparation conditions, the coating was weighted  
10 of 2% with using fluidized bed spray equipment. Prescription and preparation method of  
11 coating solution: Eudragit RS 100 (Rohm, Germany) 10.0 g, talcum powder 2.0 g and  
12 polyethylene glycol 4000 (Sinopharm Chemical Reagent Co., Ltd., Shanghai, China) 1.0 g  
13 were dissolved in 200 mL 95% ethanol by ultrasound for 10 min. The coating liquid was  
14 maintained homogenized state by magnetically stirring in the coating process.

15

16

17

18

19

20

21

22

23

1 **Table 1 S** The dose of FZHY-P

| the composition of FZHY-P            | the high dose of<br>FZHY-P group<br>(g•Kg <sup>-1</sup><br>weight) | the medium dose<br>of FZHY-P group<br>(g•Kg <sup>-1</sup><br>weight) | the low dose of<br>FZHY-P group<br>(g•Kg <sup>-1</sup><br>weight) |
|--------------------------------------|--------------------------------------------------------------------|----------------------------------------------------------------------|-------------------------------------------------------------------|
| Water-soluble immediate release unit | 37.8                                                               | 18.9                                                                 | 9.45                                                              |
| Fat-soluble immediate release unit   | 1.42                                                               | 0.709                                                                | 0.355                                                             |

2

3

4

5

6

7

8

9

10

11

12

13

14

15

1 **Table 2S** Preparation of standard curve

| Reagents                                                                | Tube No. |      |      |      |      |      |      |
|-------------------------------------------------------------------------|----------|------|------|------|------|------|------|
|                                                                         | 0        | 1    | 2    | 3    | 4    | 5    | 6    |
| Hyp standard ( $\mu\text{L}$ , $0.01\mu\text{g}\cdot\mu\text{L}^{-1}$ ) | 0        | 20   | 40   | 60   | 80   | 120  | 160  |
| As the Hyp content ( $\mu\text{g}$ )                                    | 0        | 0.2  | 0.4  | 0.6  | 0.8  | 1.2  | 1.6  |
| 50% Iso-propanol ( $\mu\text{L}$ )                                      | 1200     | 1180 | 1160 | 1140 | 1120 | 1080 | 1040 |
| Chloramine-T working fluid ( $\mu\text{L}$ )                            | 200      | 200  | 200  | 200  | 200  | 200  | 200  |
| Mixed with shaking, set at 25°C room for 10 min                         |          |      |      |      |      |      |      |
| ER working fluid ( $\mu\text{L}$ )                                      | 1000     | 1000 | 1000 | 1000 | 1000 | 1000 | 1000 |

2

3

4

5

6

7

8

9

10

11

12

13

14

15

1 **Table 3S** Each group of weight, liver weight, spleen weight, Liver/weight, Spleen/weight  
 2 and liver tissues Hyp content ( $\bar{X} \pm SD$ )

| Group                             | N  | Weight (g)      | Liver weight (g) | Spleen weight (g) | Liver weight/weight | Spleen weight/weight | Hyp ( $\mu\text{g} \cdot \text{g}^{-1}$ liver wet weight) |
|-----------------------------------|----|-----------------|------------------|-------------------|---------------------|----------------------|-----------------------------------------------------------|
| Normal group                      | 10 | 471±46.48       | 17.13±2.21       | 1.12±0.26         | 0.04±0.0030         | 0.0024±0.0004        | 95.90±9.01                                                |
| Model group                       | 19 | 379±21.85<br>## | 11.95±2.24<br>## | 1.68±0.32<br>##   | 0.03±0.0048<br>##   | 0.0045±0.0010<br>##  | 215.69±39.16<br>##                                        |
| Original formulation FZHY-C group | 14 | 386±29.76       | 12.76±2.30       | 1.57±0.29         | 0.03±0.0050         | 0.0041±0.0010        | 167.38±52.14<br>*                                         |
| High dose of FZHY-P               | 14 | 382±39.66       | 12.33±3.32       | 1.74±0.53         | 0.03±0.0070         | 0.0047±0.0018        | 177.50±102.9<br>6                                         |
| Medium dose of FZHY-P             | 14 | 406±25.66<br>*  | 14.68±1.69<br>** | 1.56±0.26         | 0.04±0.0029<br>**   | 0.0039±0.0005        | 161.95±18.59<br>*                                         |
| Low dose of FZHY-P                | 14 | 371±44.80       | 10.79±3.09       | 1.81±0.24         | 0.03±0.0060         | 0.0050±0.0011        | 226.76±69.38                                              |

3 Compared with normal group, ##  $P < 0.01$ ;

4 Compared with model group, \*  $P < 0.05$ , \*\*  $P < 0.01$

- 5
- 6
- 7
- 8
- 9
- 10
- 11
- 12
- 13
- 14
- 15

1 **Reference**

- 2 1. S. C. Zhou, J. T. Che and D. G. Li, *Acta. Uni. Med. Secondae. Shanghai.*, 1997, 6, 458-460.
- 3 2. Z. Q. Zhang, D. X. Zhao and X. L. Yang, *Amino. Acids. and Biotic. Resources.*, 2006, 1, 55-58.
- 4 3. P. Liu, Y. Y. Hu, C. Liu, C. H. Liu, H. M. Xue, L. M. Xu, F. H. Li, H. T. Gu, C. Q. Zhao and L. L.
- 5 Zhou, *Bull. Med. Res.*, 2004, 11, 26-27.
- 6 4. C. Liu, P. Liu, C. H. Liu, X. Q. Zhu and G. Ji, *Chin. J. Integrated. Trad. and West. Med. on*
- 7 *Gastro-spleen.*, 1998, 1, 29-31.

8

9
